# Supplementary material for: Metabologenomic Approach Reveals Intestinal Environmental Features Associated with Barley-Induced Glucose Tolerance Improvements in Japanese: A Randomized Controlled Trial
Source: MDPI journal article supplement (doi:10.3390/nu14173468), 2022-08-24
Supplement: s1 [file s1]

Supplementary Figures

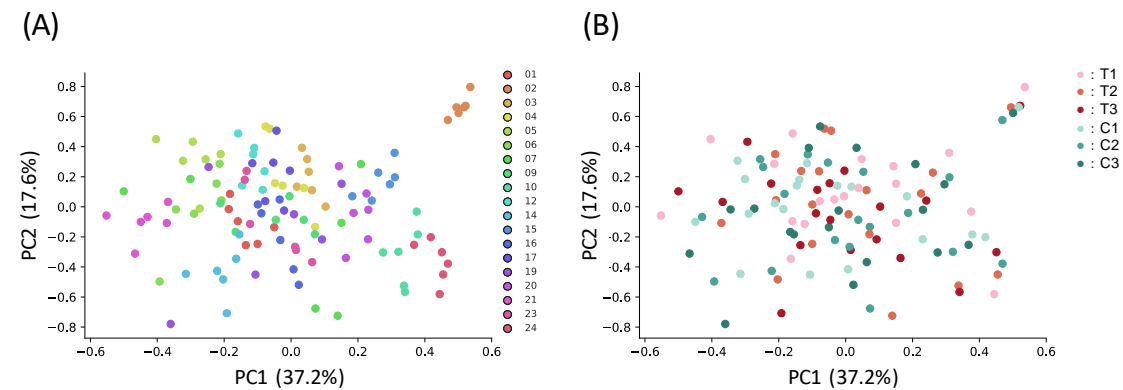

**Figure S1.** Individual differences were larger than the influence of barley or control food consumption on microbiome (weighted UniFrac distance)

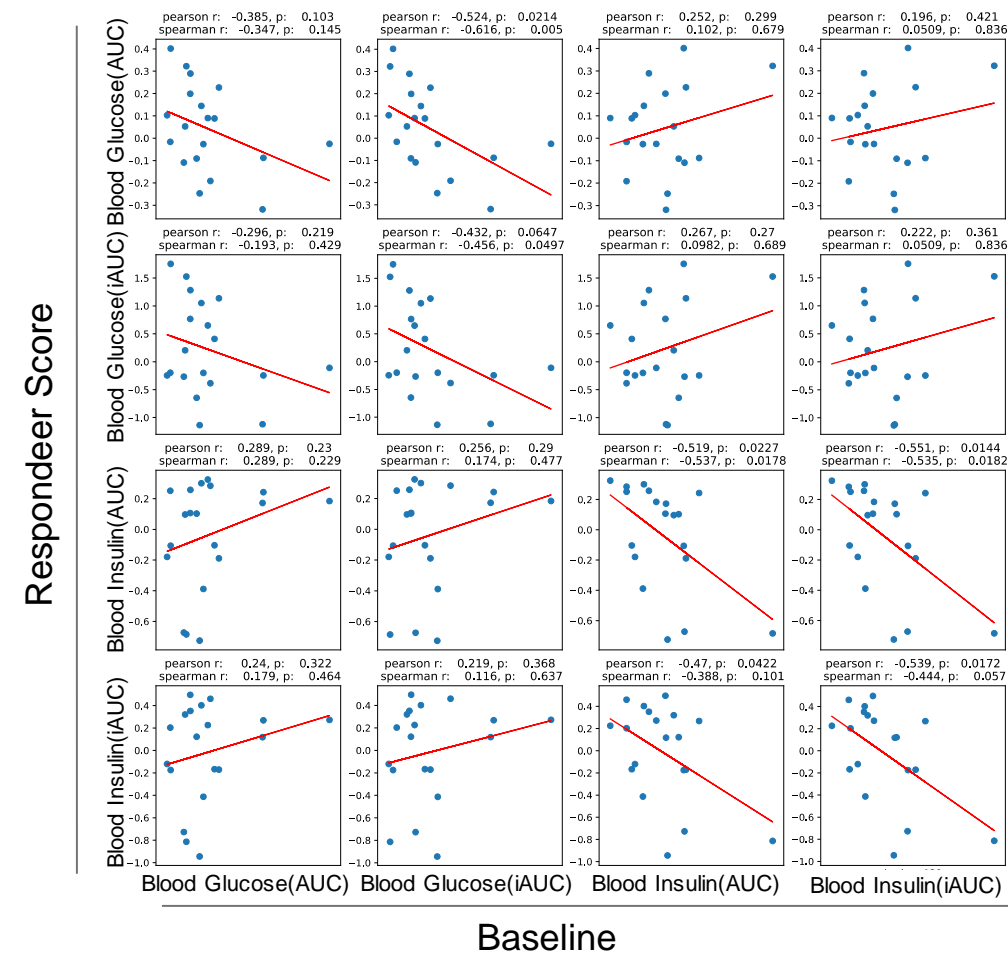

**Figure S2.** Improvement of blood glucose AUC/iAUC by barley intake does not depends on blood insulin AUC/iAUC at baseline and vice versa.
